# Supplementary material for: Plasma membrane permeabilisation by ionic liquids: a matter of charge
Source: Royal Society of Chemistry journal article supplement (doi:10.1039/c5gc01472g), 2015-01-01
Supplement: c5gc01472g1.pdf [file c5gc01472g1.pdf]

## Electronic Supplementary Information

### Plasma membrane permeabilisation by ionic liquids: a matter of charge

Diego O. Hartmann,<sup>a</sup> Karina Shimizu,<sup>b†</sup> Filipa Siopa,<sup>c†</sup> M. Cristina Leitão,<sup>a</sup>  
Carlos A. M. Afonso,<sup>c</sup> José N. Canongia Lopes<sup>a,b</sup> and Cristina Silva Pereira<sup>\*a</sup>

<sup>a</sup> Instituto de Tecnologia Química e Biológica, Universidade Nova de Lisboa, Av. da República,  
2780-157, Oeiras, Portugal

<sup>b</sup> Centro de Química Estrutural, Instituto Superior Técnico, Universidade de Lisboa, Avenida  
Rovisco Pais 1, 1049-001 Lisboa, Portugal

<sup>c</sup> iMed.Ulisboa, Faculdade de Farmácia da Universidade de Lisboa, Av. Prof. Gama Pinto, 1649-  
003 Lisboa, Portugal

<sup>†</sup>Equally contributing authors

<sup>\*</sup>Corresponding author: [spereira@itqb.unl.pt](mailto:spereira@itqb.unl.pt)

## Experimental

### General remarks

All chemicals, reagents and solvents for the synthesis of the compounds were of analytical grade, purchased from commercial sources, namely Sigma-Aldrich<sup>®</sup>, Merck and Alfa Aesar and these were used without further purification. The synthesis of the alkyl-(2-hydroxyethyl)-dimethylammonium bromides ( $[N_{1\ 1\ n\ 2OH}]$ ,  $n = 2, 4, 6, 8$  and  $12$ ) has been previously described by us.<sup>1</sup> <sup>1</sup>H and <sup>13</sup>C NMR spectra were measured on an Ultrashield Bruker Avance II 300 spectrometer and Ultrashield Bruker Avance II 400 spectrometer. Splitting patterns are indicated as *s*, singlet; *d*, doublet; *t*, triplet; *q*, quartet; *m*, multiplet; *br*, broad peak. The low resolution electrospray ionization mass spectra were recorded using a Micromass<sup>®</sup> Quattro Micro triple quadrupole (Waters<sup>®</sup>, Ireland) with an electrospray (ESI) ion source. Elemental analysis was performed in a Flash 2000 CHNS-O analyzer (Thermo Scientific, UK). Melting points were determined on a Stuart SMP10 apparatus.

### General method for the synthesis of alkyl-(2-hydroxyethyl)-dimethylammonium bromides

In a Aldrich ace pressure tube (Z181064) at room temperature, a solution of the correspondent brominated derivative (45 mmol) dissolved in MeCN (5 mL) was added to a solution of 2-(dimethylamino)ethanol (4.1 g, 45 mmol) in MeCN (5 mL) and heated overnight at 60 °C, unless stated. For the compounds  $[N_{1\ 1\ 2\ 2OH}]Br$ ,  $[N_{1\ 1\ 4\ 2OH}]Br$ , the salt precipitated during the reaction, while for the compound  $[N_{1\ 1\ 12\ 2OH}]Br$ , the salt precipitated when the Aldrich ace pressure tube was cooling to room temperature. Diethyl ether was added and the salt was filtered and dried under vacuum. For the compounds  $[N_{1\ 1\ 6\ 2OH}]Br$ ,  $[N_{1\ 1\ 8\ 2OH}]Br$ , and  $[N_{1\ 1\ 10\ 2OH}]Br$ , in which the reaction mixture was liquid, the solvent was evaporated and diethyl ether was added to precipitate the product. The ionic liquid was then filtered and dried under vacuum.

**Ethyl-(2-hydroxyethyl)-dimethylammonium bromide** ( $[N_{1\ 1\ 2\ 2OH}]Br$ ). The reaction mixture was heated for 20 min. The product was collected as a white solid in 96 % yield, m.p. 280-282°C (Lit. 282 - 284°C)<sup>2</sup>. <sup>1</sup>H NMR (300 MHz, D<sub>2</sub>O)  $\delta$  4.02-3.97 (m, 2H), 3.47 – 3.39 (m, 4H), 3.08 (s, 6H), 1.35 – 1.28 (m, 3H). <sup>13</sup>C NMR (75 MHz, D<sub>2</sub>O)  $\delta$  64.41, 61.04, 55.39, 50.91, 50.86, 7.73. Anal. Calcd for C<sub>6</sub>H<sub>16</sub>BrNO: C, 36.38; H, 8.14; N, 7.07. Found: C, 36.13; H, 8.24; N, 7.24. Spectral data <sup>1</sup>H and <sup>13</sup>C NMR identical to reported one.<sup>3</sup>

**Butyl-(2-hydroxyethyl)-dimethylammonium bromide** ( $[N_{1\ 1\ 4\ 2OH}]Br$ ). The salt was recovered as a white solid in 96 %, m.p. 110-113 °C. <sup>1</sup>H NMR (300 MHz, D<sub>2</sub>O)  $\delta$  3.97 (s, 2H), 3.44 – 3.40 (m, 2H), 3.34 - 3.29 (m, 2H), 3.07 (s, 6H), 1.75 – 1.64 (m, 2H), 1.38 – 1.25 (m, 2H), 0.88 (t, *J* = 7.5 Hz, 3H). <sup>13</sup>C NMR (75 MHz, D<sub>2</sub>O)  $\delta$  65.30, 64.83, 55.39, 51.46, 51.41, 23.98, 19.10, 12.91. Anal. Calcd for C<sub>8</sub>H<sub>20</sub>BrNO: C, 42.49; H, 8.91; N, 6.19. Found: C, 42.64; H, 9.22; N, 6.43. Spectral data <sup>1</sup>H and <sup>13</sup>C NMR identical to reported one.<sup>3</sup>

**Hexyl-(2-hydroxyethyl)-dimethylammonium bromide** ( $[N_{1\ 1\ 6\ 2OH}]Br$ ). The reaction mixture was heated during 72 h. The product was obtained as a white gummy in 95 %. <sup>1</sup>H NMR (300 MHz, CDCl<sub>3</sub>)  $\delta$  3.79 (s, 2H), 3.44 – 3.41 (m, 2H), 3.33 – 3.27 (m, 2H), 3.08 (s, 6H), 1.48 (s, 2H), 1.05 – 1.01 (m, 6H), 0.59 (t, *J* = 7.5 Hz, 3H). <sup>13</sup>C NMR (75 MHz, CDCl<sub>3</sub>)  $\delta$  65.25, 65.86, 55.17, 51.49, 30.60, 25.27, 22.17, 21.79, 13.37. Spectral data <sup>1</sup>H and <sup>13</sup>C NMR identical to reported one.<sup>3</sup>

**Octyl-(2-hydroxyethyl)-dimethylammonium bromide** ( $[N_{1\ 1\ 8\ 2OH}]Br$ ). A white salt was obtained in 93 %, m.p. 107-110 °C (Lit. 116 – 118 °C)<sup>4</sup>. <sup>1</sup>H NMR (300 MHz, CDCl<sub>3</sub>)  $\delta$  4.07 (s, 2H), 3.71 - 3.70 (m, 2H), 3.54 – 3.49 (m, 2H), 3.33 (s, 6H), 1.71 (s, 2H), 1.31 - 1.22 (m, 10H), 0.83

(t,  $J = 6.0$  Hz, 3H).  $^{13}\text{C}$  NMR (75 MHz,  $\text{CDCl}_3$ )  $\delta$  66.00, 65.56, 55.82, 52.07, 31.61, 29.12, 29.02, 26.24, 22.85, 22.54, 14.05. Spectral data  $^1\text{H}$  NMR identical to reported one.<sup>4</sup>

**Decyl-(2-hydroxyethyl)-dimethylammonium bromide** ( $[\text{N}_{11102\text{OH}}]\text{Br}$ ). The product was obtained as a white solid in 95 %, m.p. 167-168 °C.  $^1\text{H}$  NMR (400 MHz,  $\text{D}_2\text{O}$ )  $\delta$  3.95 (s, 2H), 3.43 (s, 2H), 3.34 – 3.32 (m, 2H), 3.08 (s, 6H), 1.70 (s, 2H), 1.28 – 1.20 (m, 14H), 0.78 (d,  $J = 6.6$  Hz, 3H).  $^{13}\text{C}$  NMR (101 MHz,  $\text{D}_2\text{O}$ )  $\delta$  65.25, 64.95, 55.37, 51.51, 31.69, 29.18, 28.83, 25.95, 22.47, 22.29, 13.77. Anal. Calcd for  $\text{C}_{14}\text{H}_{32}\text{BrNO}$ : C, 54.19; H, 10.39; N, 4.51. Found: C, 54.19; H, 10.30; N, 4.53. Spectral data  $^1\text{H}$  identical to reported one.<sup>5</sup>

**Dodecyl-(2-hydroxyethyl)-dimethylammonium bromide** ( $[\text{N}_{11122\text{OH}}]\text{Br}$ ). A white solid was recovered in 95 %, m.p. 190-193 °C (Lit 193 - 196 °C)<sup>6</sup>.  $^1\text{H}$  NMR (300 MHz,  $\text{CDCl}_3$ )  $\delta$  4.04 (s, 2H), 3.69 – 3.66 (m, 2H), 3.52 – 3.46 (m, 2H), 3.30 (s, 6H), 1.68 (s, 2H), 1.28 – 1.18 (m, 18H), 0.80 (t,  $J = 7.5$  Hz, 3H).  $^{13}\text{C}$  NMR (75 MHz,  $\text{CDCl}_3$ )  $\delta$  66.01, 65.55, 55.80, 52.06, 31.85, 29.56, 29.46, 29.40, 29.29, 29.21, 26.26, 22.87, 22.64, 14.09. Spectral data  $^1\text{H}$  NMR identical to reported one.<sup>5</sup>

1. A e Silva, F.; Siopa, F.; Figueiredo, B. F. H. T.; Goncalves, A. M.; Pereira, J. L.; Goncalves, F.; Coutinho, J. A.; Afonso, C. A. M.; Ventura, S. P. M., *Ecotoxicol Environ Saf* **2014**, *108*, 302-310.
2. Parkkari, J. H.; Bannard, R. A. B.; Coleman, I. W., *Can J Chemistry* **1965**, *43*, 3119-3128.
3. Domanska, U.; Bogel-Lukasik, R., *J Phys Chem B* **2005**, *109*, 12124-12132.
4. Calas, M.; Ancelin, M. L.; Cordina, G.; Portefaix, P.; Piquet, G.; Vidal-Sailhan, V.; Vial, H., *J Med Chem* **2000**, *43*, 505-516.
5. Calas, M.; Cordina, G.; Bompart, J.; BenBari, M.; Jei, T.; Ancelin, M. L.; Vial, H., *J Med Chem* **1997**, *40*, 3557-3566.
6. Moss, R. A.; Chiang, Y. C. P.; Hui, Y. Z., *J Am Chem Soc* **1984**, *106*, 7506-7513.

**Table S1.** Liquid chromatography conditions for the quantification of ionic liquids organic ions in the culture media. The tested ionic liquids were: 1-alkyl-3-methylimidazolium chlorides ( $[C_n\text{mim}]\text{Cl}$ ,  $n = 2, 4, 6, 8$  or  $10$ ), cholinium alkanoates (anion =  $[\text{eth}]^-$ ,  $[\text{but}]^-$ ,  $[\text{hex}]^-$ ,  $[\text{oct}]^-$  or  $[\text{dec}]^-$ ) and alkyl-(2-hydroxyethyl)-dimethylammonium bromides ( $[\text{N}_{11n2\text{OH}}]\text{Br}$ ,  $n = 2, 4, 6$ )<sup>a</sup>.

| Ion                            | Detection / nm | Column                                                                                                                         | Mobile phase <sup>b</sup>                                                                                                                                          | Flow rate / mL min <sup>-1</sup> |
|--------------------------------|----------------|--------------------------------------------------------------------------------------------------------------------------------|--------------------------------------------------------------------------------------------------------------------------------------------------------------------|----------------------------------|
| $[\text{C}_2\text{mim}]^+$     | 218            | Synergi Polar-RP column (150 × 4.6 mm) packed with polar endcapped particles (4 μm, pore size 80 Å) (Phenomenex), set at 26 °C | 98% A1 + 2% B1                                                                                                                                                     | 0.8                              |
| $[\text{C}_4\text{mim}]^+$     |                |                                                                                                                                | 94% A1 + 6% B1                                                                                                                                                     | 1.2                              |
| $[\text{C}_6\text{mim}]^+$     |                |                                                                                                                                | 80% A1 + 20% B1                                                                                                                                                    | 1.2                              |
| $[\text{C}_8\text{mim}]^+$     |                |                                                                                                                                | 50% A1 + 50% B1                                                                                                                                                    | 1.0                              |
| $[\text{C}_{10}\text{mim}]^+$  |                |                                                                                                                                | 40% A1 + 60% B1                                                                                                                                                    | 1.0                              |
| $[\text{N}_{1112\text{OH}}]^+$ | 215            | Synergi Polar-RP column (150 × 4.6 mm) packed with polar endcapped particles (4 μm, pore size 80 Å) (Phenomenex), set at 26 °C | 98% A2 + 2% B2                                                                                                                                                     | 1.0                              |
| $[\text{N}_{1122\text{OH}}]^+$ |                |                                                                                                                                | 95% A2 + 5% B2                                                                                                                                                     |                                  |
| $[\text{N}_{1142\text{OH}}]^+$ |                |                                                                                                                                | 70% A2 + 30% B2                                                                                                                                                    |                                  |
| $[\text{N}_{1162\text{OH}}]^+$ |                |                                                                                                                                | 45% A2 + 55% B2                                                                                                                                                    |                                  |
| $[\text{eth}]^-$               | 212            | Acquity UPLC HSS C18 (2.1 × 150 mm), 1.8 μm particle size column (Waters), set at 25 °C                                        | Linear gradient from 10% to 95% of B3 (90% to 5% of A3) in 5.7min, then to 100% of B3 in 1.3 min. Return to initial conditions in 1.5 min, maintaining for 1.5 min | 0.4                              |
| $[\text{but}]^-$               |                |                                                                                                                                |                                                                                                                                                                    |                                  |
| $[\text{hex}]^-$               |                |                                                                                                                                |                                                                                                                                                                    |                                  |
| $[\text{oct}]^-$               |                |                                                                                                                                |                                                                                                                                                                    |                                  |
| $[\text{dec}]^-$               |                |                                                                                                                                |                                                                                                                                                                    |                                  |

<sup>a</sup>) The  $[\text{N}_{1182\text{OH}}]^+$ ,  $[\text{N}_{11102\text{OH}}]^+$  and  $[\text{N}_{11122\text{OH}}]^+$  cations could not be quantified since their initial concentrations were below the detection limits of the established method. <sup>b</sup>) A1) aqueous solution of 5 mM phosphate buffer, pH 3; B1) acetonitrile; A2) aqueous solution of 0.1% (v/v) heptafluorobutyric acid, pH 6; B2) methanol, A3) aqueous solution of 0.1% (v/v) phosphoric acid; B3) acetonitrile.

**Table S2.** List of the designed *q*RT-PCR oligonucleotides (forward and reverse) used in this study. Oligonucleotides were designed based on the sequences of *A. nidulans* genes, obtained from the *Aspergillus* Genome Database (<http://www.aspergillusgenome.org/>). The selected genes are involved in plasma membrane biosynthesis of *Aspergillus nidulans*. The  $\gamma$ -actin (*actA*) gene was selected as housekeeping (internal control).

| <b>Name</b> | <b>Gene (Code)</b>    | <b>Sequence (5' to 3')</b> |
|-------------|-----------------------|----------------------------|
| HMGR1f      | <i>HMGR1</i> (AN3817) | AAGCACTCCATGTCATGGCTA      |
| HMGR1r      | <i>HMGR1</i> (AN3817) | TAATAGCCTCAGCCACAACCTGA    |
| AN9407F     | <i>fasA</i> (AN9407)  | CTTCAAAGCAAGGTCTTCCTGA     |
| AN9407R     | <i>fasA</i> (AN9407)  | CGCCAGGGACTCAATCACA        |
| AN9408F     | <i>fasB</i> (AN9408)  | TTGGAAGACGTGAAGGCTCA       |
| AN9408R     | <i>fasB</i> (AN9408)  | GGTACGTCGATTCCCTTCAGA      |
| barAf       | <i>barA</i> (AN4332)  | GTGGTGCTCAACCTGATGGA       |
| barAr       | <i>barA</i> (AN4332)  | TGGGTACATGATATGGCGTGA      |
| lagAf       | <i>lagA</i> (AN2464)  | TCCCCACAGAGAGCACGAA        |
| lagAr       | <i>lagA</i> (AN2464)  | GATGATGTGGTGGCCCCACA       |
| ACTF        | <i>actA</i> (AN6542)  | CTGGGACGACATGGAGAAGAT      |
| ACTR        | <i>actA</i> (AN6542)  | GTAGATGGGGACGACGTGAG       |

**Table S3.** Minimal inhibitory and fungicidal concentrations (MIC and MFC, respectively) of 1-alkyl-3-methylimidazolium chlorides ( $[C_n\text{mim}]\text{Cl}$ ,  $n = 2, 4, 6, 8$  or  $10$ ), cholinium alkanooates (anion =  $[\text{eth}]^-$ ,  $[\text{but}]^-$ ,  $[\text{hex}]^-$ ,  $[\text{oct}]^-$  or  $[\text{dec}]^-$ ) and alkyl-(2-hydroxyethyl)-dimethylammonium bromides ( $[\text{N}_{11n2\text{OH}}]\text{Br}$ ,  $n = 2, 4, 6, 8, 10$  or  $12$ ) defined for *Aspergillus nidulans*.

| <b>Ionic liquid</b>                                     | <b>MIC / mM</b> | <b>MFC / mM</b> |
|---------------------------------------------------------|-----------------|-----------------|
| <i>1-alkyl-3-methylimidazolium chlorides</i>            |                 |                 |
| $[\text{C}_2\text{mim}]\text{Cl}$                       | 1390            | >4000*          |
| $[\text{C}_4\text{mim}]\text{Cl}$                       | 445             | 450             |
| $[\text{C}_6\text{mim}]\text{Cl}$                       | 7               | 7               |
| $[\text{C}_8\text{mim}]\text{Cl}$                       | 0.9             | 0.9             |
| $[\text{C}_{10}\text{mim}]\text{Cl}$                    | 0.2             | 0.2             |
| <i>cholinium alkanooates</i>                            |                 |                 |
| $[\text{N}_{1112\text{OH}}][\text{eth}]$                | 1450            | >4000*          |
| $[\text{N}_{1112\text{OH}}][\text{but}]$                | 345             | 1000            |
| $[\text{N}_{1112\text{OH}}][\text{hex}]$                | 56              | 59              |
| $[\text{N}_{1112\text{OH}}][\text{oct}]$                | 19.8            | 22.8            |
| $[\text{N}_{1112\text{OH}}][\text{dec}]$                | 4.3             | 5               |
| <i>alkyl-(2-hydroxyethyl)-dimethylammonium bromides</i> |                 |                 |
| $[\text{N}_{1122\text{OH}}]\text{Br}$                   | >2000*          | >2000*          |
| $[\text{N}_{1142\text{OH}}]\text{Br}$                   | 890             | >2000*          |
| $[\text{N}_{1162\text{OH}}]\text{Br}$                   | 105             | 105             |
| $[\text{N}_{1182\text{OH}}]\text{Br}$                   | 16.5            | 16.5            |
| $[\text{N}_{11102\text{OH}}]\text{Br}$                  | 2               | 2               |
| $[\text{N}_{11122\text{OH}}]\text{Br}$                  | 0.2             | 0.2             |

\*MIC or MFC could not be determined and is estimated to be above the maximum concentrations tested

**Table S4.** Percentage of membrane-damaged conidia after one hour of incubation with distinct concentrations of 1-alkyl-3-methylimidazolium chlorides ( $[C_n\text{mim}]\text{Cl}$ ,  $n = 2, 4, 6, 8$  or  $10$ ), cholinium alkanooates (anion =  $[\text{eth}]^-$ ,  $[\text{but}]^-$ ,  $[\text{hex}]^-$ ,  $[\text{oct}]^-$  or  $[\text{dec}]^-$ ) or alkyl-(2-hydroxyethyl)-dimethylammonium bromides ( $[\text{N}_{11n2\text{OH}}]\text{Br}$ ,  $n = 2, 4, 6, 8, 10$  or  $12$ ). Values were obtained as: (number of propidium iodide-stained conidia / total number of conidia)  $\times 100$ . Percentage in the saline solution control was 5.87%. Emboldened values were obtained with concentrations above the minimal fungicidal concentration.

| Ionic liquid                                            | Concentration / mM |                |                                  |                                  |                                  |                                  |                |
|---------------------------------------------------------|--------------------|----------------|----------------------------------|----------------------------------|----------------------------------|----------------------------------|----------------|
|                                                         | 0.01               | 0.1            | 1                                | 10                               | 100                              | 1000                             | 2000           |
| <i>1-alkyl-3-methylimidazolium chlorides</i>            |                    |                |                                  |                                  |                                  |                                  |                |
| $[\text{C}_2\text{mim}]\text{Cl}$                       | n.d.               | n.d.           | n.d.                             | n.d.                             | n.d.                             | $7.8 \pm 3.6$                    | $8.0 \pm 3.7$  |
| $[\text{C}_4\text{mim}]\text{Cl}$                       | n.d.               | $5.6 \pm 0.5$  | $6.3 \pm 1.8$                    | $6.3 \pm 1.1$                    | $32.3 \pm 2.0$                   | <b><math>32.4 \pm 2.1</math></b> | n.d.           |
| $[\text{C}_6\text{mim}]\text{Cl}$                       | $7.1 \pm 0.7$      | $9.2 \pm 1.5$  | $11.4 \pm 0.6$                   | <b><math>25.0 \pm 3.7</math></b> | <b><math>34.6 \pm 1.0</math></b> | n.d.                             | n.d.           |
| $[\text{C}_8\text{mim}]\text{Cl}$                       | $8.2 \pm 2.2$      | $10.5 \pm 2.0$ | <b><math>16.8 \pm 3.6</math></b> | <b><math>46.7 \pm 3.6</math></b> | <b><math>92.6 \pm 3.8</math></b> | n.d.                             | n.d.           |
| $[\text{C}_{10}\text{mim}]\text{Cl}$                    | $9.8 \pm 1.8$      | $13.6 \pm 1.5$ | <b><math>50.0 \pm 6.3</math></b> | <b><math>91.4 \pm 4.6</math></b> | <b><math>94.7 \pm 4.1</math></b> | n.d.                             | n.d.           |
| <i>cholinium alkanooates</i>                            |                    |                |                                  |                                  |                                  |                                  |                |
| $[\text{N}_{1112\text{OH}}][\text{eth}]$                | n.d.               | n.d.           | n.d.                             | n.d.                             | n.d.                             | $12.4 \pm 6.2$                   | $27.9 \pm 1.9$ |
| $[\text{N}_{1112\text{OH}}][\text{but}]$                | n.d.               | $5.6 \pm 0.2$  | $6.9 \pm 1.0$                    | $8.1 \pm 1.4$                    | $9.2 \pm 0.9$                    | <b><math>31.2 \pm 4.1</math></b> | n.d.           |
| $[\text{N}_{1112\text{OH}}][\text{hex}]$                | $5.8 \pm 0.9$      | $5.7 \pm 0.8$  | $6.1 \pm 0.3$                    | $6.6 \pm 1.3$                    | <b><math>8.2 \pm 1.6</math></b>  | n.d.                             | n.d.           |
| $[\text{N}_{1112\text{OH}}][\text{oct}]$                | $5.2 \pm 0.9$      | $5.9 \pm 1.1$  | $5.7 \pm 1.3$                    | $6.5 \pm 1.1$                    | <b><math>9.7 \pm 1.9</math></b>  | n.d.                             | n.d.           |
| $[\text{N}_{1112\text{OH}}][\text{dec}]$                | $5.3 \pm 1.0$      | $7.1 \pm 1.0$  | $6.9 \pm 2.7$                    | <b><math>14.2 \pm 1.3</math></b> | <b><math>25.9 \pm 2.7</math></b> | n.d.                             | n.d.           |
| <i>alkyl-(2-hydroxyethyl)-dimethylammonium bromides</i> |                    |                |                                  |                                  |                                  |                                  |                |
| $[\text{N}_{1122\text{OH}}]\text{Br}$                   | n.d.               | n.d.           | n.d.                             | n.d.                             | n.d.                             | $12.8 \pm 1.0$                   | n.d.           |
| $[\text{N}_{1142\text{OH}}]\text{Br}$                   | n.d.               | $5.9 \pm 1.0$  | $5.9 \pm 0.7$                    | $7.5 \pm 0.5$                    | $11.3 \pm 1.4$                   | $11.6 \pm 2.0$                   | n.d.           |
| $[\text{N}_{1162\text{OH}}]\text{Br}$                   | $6.0 \pm 2.0$      | $5.9 \pm 0.3$  | $4.6 \pm 0.5$                    | $11.0 \pm 0.8$                   | $25.8 \pm 0.5$                   | n.d.                             | n.d.           |
| $[\text{N}_{1182\text{OH}}]\text{Br}$                   | $5.0 \pm 0.8$      | $7.6 \pm 1.7$  | $7.8 \pm 0.8$                    | $20.7 \pm 2.4$                   | <b><math>91.3 \pm 2.6</math></b> | n.d.                             | n.d.           |
| $[\text{N}_{11102\text{OH}}]\text{Br}$                  | $5.8 \pm 1.7$      | $6.5 \pm 2.0$  | $33.2 \pm 0.6$                   | <b><math>82.0 \pm 3.0</math></b> | <b><math>93.8 \pm 1.7</math></b> | n.d.                             | n.d.           |
| $[\text{N}_{11122\text{OH}}]\text{Br}$                  | $8.8 \pm 1.5$      | $25.8 \pm 0.5$ | <b><math>86.8 \pm 5.1</math></b> | <b><math>94.8 \pm 2.1</math></b> | <b><math>95.2 \pm 0.7</math></b> | n.d.                             | n.d.           |

n.d. = not determined.

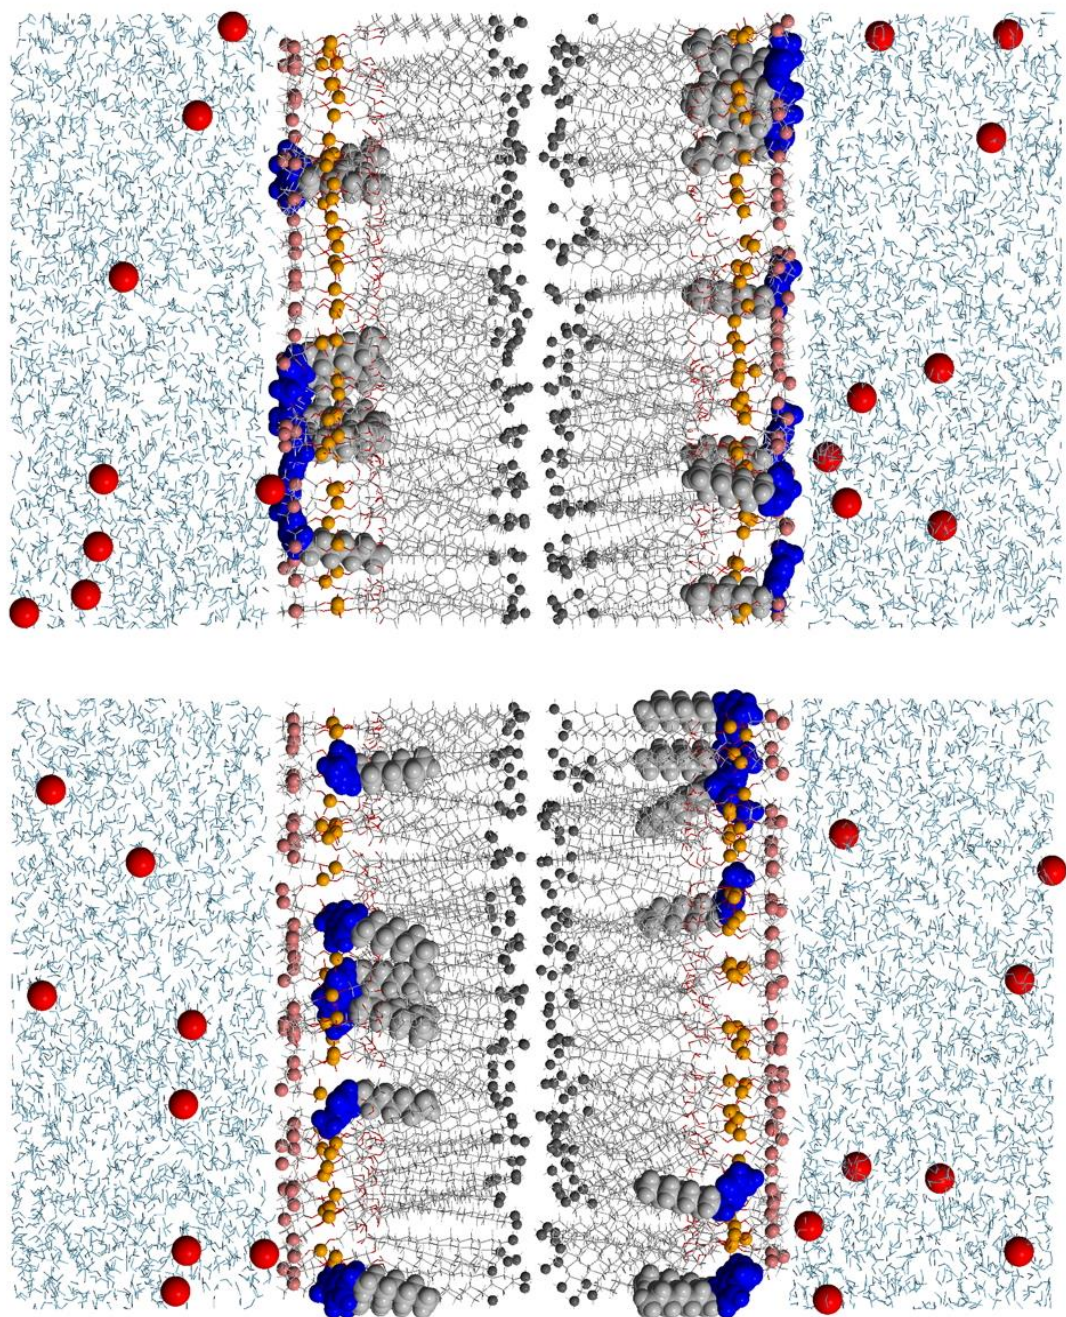

**Figure S4.** Initial configuration snapshots of a section of a mixed phospholipids bilayer in water with 16 ion pairs (1-octyl-3-methylimidazolium chloride,  $[C_8mim]Cl$ ) initially incorporated in the bilayer: (top) charged cation headgroups close to the ammonium groups in the phospholipids; (bottom) charged cation headgroups close to the phosphate groups in the phospholipids.



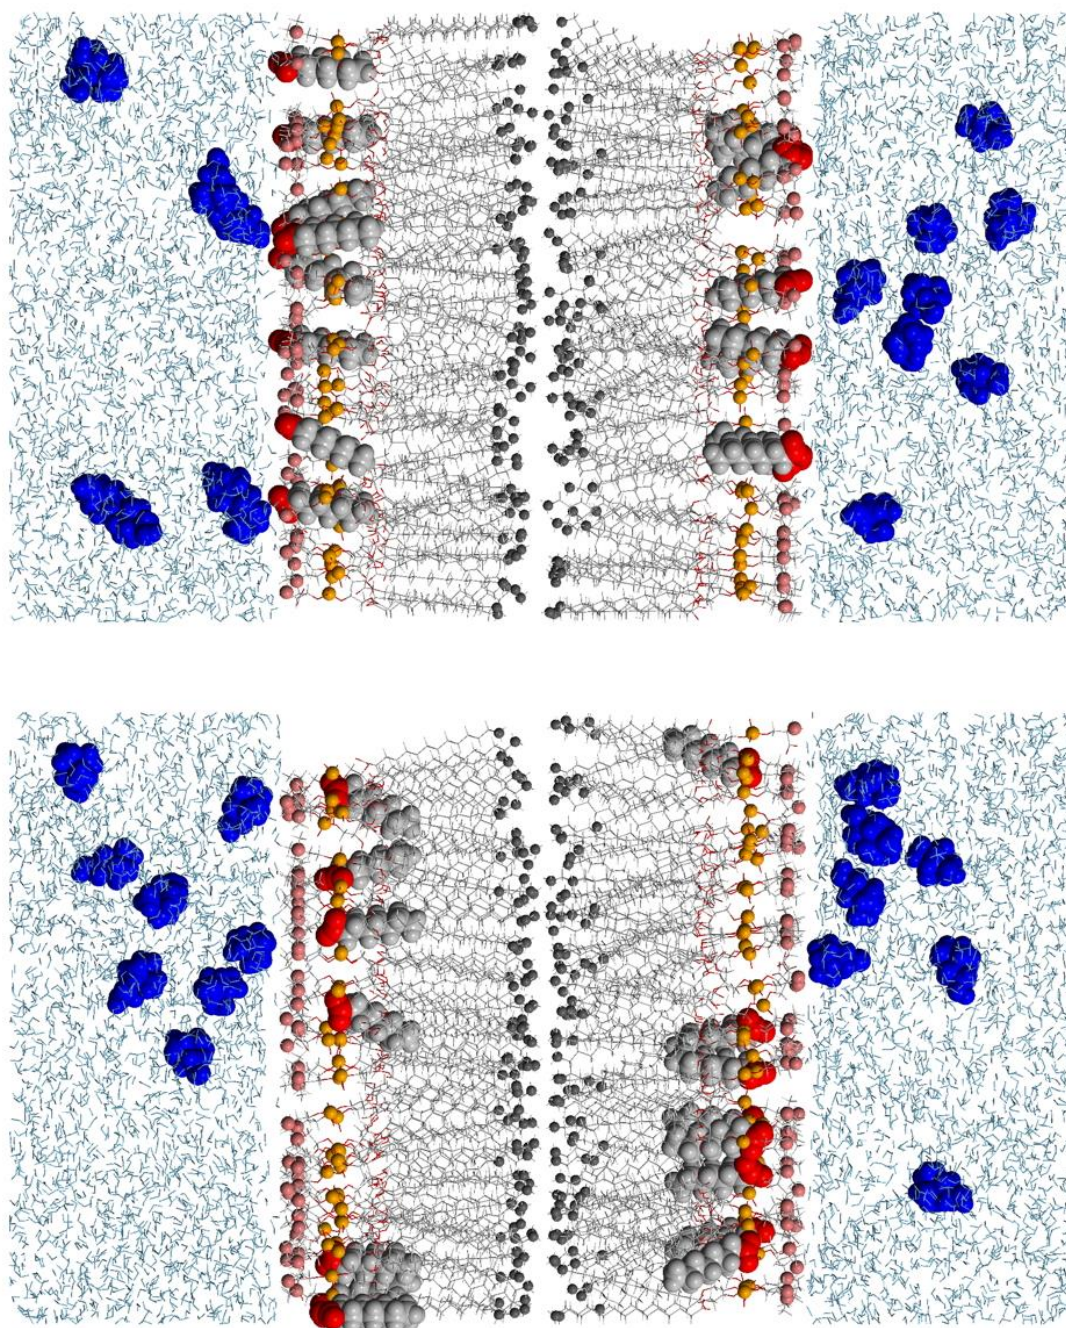

**Figure S5.** Initial configuration snapshots of a section of a mixed phospholipids bilayer in water with 16 ion pairs (cholinium octanoate,  $[N_{1112OH}][oct]$ ) initially incorporated in the bilayer: (top) charged anion headgroups close to the ammonium groups in the phospholipids; (bottom) charged anion headgroups close to the phosphate groups in the phospholipids.
